## RESEARCH ARTICLE

# Seroprevalence of rubella virus antibodies among pregnant women in the Center and South-West regions of Cameroon

Nadesh Ashukem Taku<sup>1\*</sup>, Valantine Ngum Ndze<sup>2</sup>, Emily Abernathy<sup>3</sup>, LiJuan Hao<sup>3</sup>, Diane Waku-Kouomou<sup>3,4</sup>, Joseph P. Icenogle<sup>3</sup>, Samuel Wanji<sup>1</sup>, Jane-Francis K. T. Akoachere<sup>1</sup>

**1** Department of Microbiology and Parasitology, Faculty of Science, University of Buea, Buea, Cameroon, **2** Faculty of Medicine and Biomedical Sciences, University of Yaoundé I, Yaoundé, Cameroon, **3** Centers for Disease Control and Prevention, Atlanta, Georgia, United States of America, **4** IHRC Inc, Atlanta, Georgia, United States of America

\* [takuashukem@yahoo.com](mailto:takuashukem@yahoo.com)

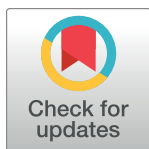

## OPEN ACCESS

**Citation:** Taku NA, Ndze VN, Abernathy E, Hao L, Waku-Kouomou D, Icenogle JP, et al. (2019) Seroprevalence of rubella virus antibodies among pregnant women in the Center and South-West regions of Cameroon. PLoS ONE 14(11): e0225594. <https://doi.org/10.1371/journal.pone.0225594>

**Editor:** Charles S. Wiysonge, South African Medical Research Council, SOUTH AFRICA

**Received:** May 13, 2019

**Accepted:** November 7, 2019

**Published:** November 21, 2019

**Copyright:** This is an open access article, free of all copyright, and may be freely reproduced, distributed, transmitted, modified, built upon, or otherwise used by anyone for any lawful purpose. The work is made available under the [Creative Commons CC0](https://creativecommons.org/licenses/by/4.0/) public domain dedication.

**Data Availability Statement:** All relevant data are within the manuscript and its Supporting Information files.

**Funding:** We would like to clarify that IHRC Inc. is a contracting company to the Centers for Diseases Control in charge of contract administration and payment of staff salaries. DWK received support by appointment to the National Center for Immunization and Respiratory Diseases (NCIRD) at the Centers for Diseases Control, administered by

## Abstract

Rubella infection in early pregnancy can lead to miscarriages, fetal death, or birth of an infant with congenital rubella syndrome (CRS). In Cameroon, like in many developing countries, rubella surveillance is not well-established. The aim of this study was to determine the prevalence of rubella virus specific antibodies among pregnant Cameroonians. We conducted a cross-sectional study for rubella infection among pregnant women attending antenatal clinics in the Center and South-West regions of Cameroon. Demographic data and blood were collected and tested for rubella specific antibodies (IgG and IgM), and for the IgM positive cases, IgG avidity and real time PCR was done. From December 2015 to July 2017, 522 serum samples were collected and tested from pregnant women. The seroprevalence of rubella specific IgG was 94.4%, presumably due to immunity induced by wild-type rubella virus. The seroprevalence of rubella specific IgM was 5.0%, possibly indicating rubella infection. However, IgG avidity testing of the IgM positive cases detected high avidity IgGs, ranging from 52.37% to 87.70%, indicating past rubella infection. 5.6% (29/522) of the participants had negative results for IgG to rubella virus, indicating susceptibility to rubella infection. None of the participants had received a rubella containing vaccine (RCV), but 51% (266/522) of the pregnant women lived in a house with a child with records of at least one dose of RCV. Rubella virus RNA was not detected in the urine of any IgM positive case. Findings from this study show that rubella infection is significant in Cameroon. Some pregnant women are still susceptible to rubella infection. For a better management of rubella infection in pregnancy in Cameroon, consideration should be taken to investigate for IgG-avidity test in cases with positive rubella IgM result to distinguish between recent from past rubella infection.

IHRC Inc. through contract number 61249. DWK conceived the study, provided key technical guidance, critically revised the manuscript, read and approved the final manuscript. IHRC Inc. provided contract administration support in the form of salaries payments for authors [DWK], but did not have any additional role in the study design, data collection and analysis, decision to publish, or preparation of the manuscript. The specific roles of these authors are articulated in the 'author contributions' section.

**Competing interests:** IHRC Inc. provided contract administration support in the form of salaries payments for authors [DWK], through contract number 61249 with the National Center for Immunization and Respiratory Diseases at the Centers for Diseases Control. This does not alter our adherence to PLOS ONE policies on sharing data and materials.

## Introduction

Rubella virus infection is transmitted by respiratory droplets and causes a generally mild disease characterized by a rash and fever, primarily in children [1]. Although the disease affects both males and females, it is a disease of public health importance in pregnant women causing major problems such as spontaneous abortions, miscarriages, stillbirths, and congenital defects including hearing impairment, heart defects, cataracts known as congenital rubella syndrome (CRS) [2]. From just before conception and during the first 8–10 weeks of gestation, rubella infection may cause multiple fetal defects in up to 90% of cases [3].

Rubella virus, the sole member of the *Rubivirus* genus in the *Togaviridae* family, is a positive-polarity ribonucleic acid virus. Both vaccination and natural infection result in life long immunity. This vaccine-preventable disease is among the small number of viral diseases considered to be potentially eradicable [4, 5]. The primary objective of rubella-control programs is prevention of congenital rubella virus infection, which can result in CRS. Cameroon introduced rubella containing vaccine (RCV) into the Expanded Program on Immunization (EPI) in 2015 through a national measles and rubella mass vaccination campaign for children under 15 years [6].

Previous reports about rubella in Cameroon indicated a prevalence of rubella IgG antibodies of 83.9% in women of reproductive age in 1992 [7] and 88.8% in women obtaining antenatal care in 2008 [8]. Recently, a study in the West region reported a prevalence of rubella IgG antibodies of 93.4% among pregnant women [9]. Additionally, a report indicated a prevalence of 1.3% of rubella IgM antibodies in febrile infants in Cameroon [10]. Prior to rubella vaccine introduction by the EPI, rubella IgM seroprevalence was estimated at 9.3% in measles negative sera [11]. There are two reports on CRS in Cameroon, a case report [12] and a study of CRS in school children [13]. Unfortunately, there is no recent report on rubella in pregnant women in the Center region. In addition, there is no report on rubella IgM seroprevalence and IgG avidity in pregnant women in Cameroon. Therefore, the goal of the current study was to re-evaluate rubella infection in pregnant women in Cameroon and to distinguish recent from past rubella infection using rubella IgG avidity testing.

## Material and method

### Study design, sites and duration

A cross-sectional study was conducted in the Center and South-West regions, to determine the seroprevalence of rubella IgG antibodies, rubella infection (IgM antibodies), and to distinguish recent infection from past infection by IgG avidity. Pregnant women were recruited from hospitals in the Center region (Yaoundé Gyneco-Obstetric and Pediatric hospital, the Mother and Child Center of the Chantal Biya Foundation and the Quality Healthcare unit) and South-West region (Buea Regional Hospital, Mount Mary Hospital and 5 health centers in the Buea health district). The recruitment was conducted from December 2015 to July 2017.

### Study participants

The study participants were pregnant women who visited the respective hospitals' antenatal care (ANC) clinics during the study period. All participants gave informed consent and the required amount of blood and urine for laboratory analysis.

### Sampling and sample size

Convenience sampling was used to recruit participants. The sample size was calculated using the Lorenz formula by considering a 95% confidence interval, cut-off value at 1.96, 0.025

margin of error and a proportion of 9.3% from a previous rubella study in Cameroon [11]. After calculations, at least 518 participants were supposed to be enrolled for the study.

## Data collection

Data were collected using a questionnaire that included participant information, clinical characteristics, family history and laboratory findings. Five milliliters of blood were collected from the subjects by venipuncture into labelled sterile tubes and allowed to clot undisturbed at room temperature. Sera was separated by centrifugation at 3,000 revolutions per minute (rpm) for five minutes and stored in two aliquots at -20°C. Urine samples were also collected in sterile urine cups and stored in two aliquots at -20°C. Samples were shipped on dry ice to the Viral Vaccine Preventable Disease Branch of the Centers for Disease Control and Prevention (CDC; Atlanta, Georgia) and stored at -70°C until laboratory analysis.

## Laboratory testing

**IgG and IgM enzyme-linked immunosorbent assay (ELISA) for rubella virus -specific antibody.** Rubella virus specific IgG antibody detection was performed on serum samples using the Zeus ELISA rubella IgG kit (Zeus Scientific, New Jersey, USA) per manufacturer's instructions. Rubella virus-specific antibody IgM detection was performed using the Diamedix immunosimplicity<sup>®</sup> Is-Rubella IgM capture test kits (Diamedix Corporation, Florida, USA) per manufacturer's instructions.

**Measurement of rubella virus-specific IgG antibody avidity.** For the IgM positive serum, rubella IgG antibody avidity testing was performed using the Zeus ELISA rubella IgG kit (Zeus Scientific, New Jersey, USA). The measurement of rubella IgG antibody avidity was used to differentiate between recent and remote rubella infection. Avidity differences were detected by using 35mM diethylamine (DEA), a protein binding inhibitor in the washing step of the indirect ELISA for rubella IgG. DEA releases antibodies with low avidity. An avidity index was calculated by comparing the optical density obtained with and without a DEA wash [14]. The cut-off between low and high avidities was established by the use of standardized sera and the Zeus ELISA rubella IgG kit. Serum samples were tested in duplicate.

**RNA extraction and diagnostic real time polymerase chain reaction (PCR).** Viral RNA was extracted from the urine of IgM positive persons using a Viral RNA Mini kit (Qiagen, Valencia, CA), per the manufacturer's instructions. Extracted viral RNA was stored at -70°C until the diagnostic real time RT-PCR was performed.

A real-time (TaqMan<sup>®</sup>) RT-PCR assay was used for the detection of rubella virus RNA using primers and probe specific to a region in the non-structural protein (NSP) coding region using the ABI 7500 Real-Time Thermocycler (Applied Biosystems, USA). Real time PCR was performed using Superscript III One-Step qRT-PCR (Invitrogen, Carlsbad, CA), to amplify a 154-nucleotide region using a Rubella virus forward primer (RV98F [5'-GGC AGT TGG GTA AGA GAC CA-3']) and a reverse primer (RV251R [5'-CGT GGA GTG CTG GGT GAT-3']). RNA samples were also tested using RNase P forward primer (HURNASE-P-F): 5'-AGA TTT GGA CCT GCG AGC G-3' and a reverse primer (HURNASE-P-R): 5'-GAG CGG CTG TCT CCA CAA GT-3' [15]. Briefly, after the reverse transcription step for 30 min at 55°C and denaturation of cDNA for 5 min at 95°C, the reaction mixtures were incubated for 35 cycles at 95°C for 30s, 60°C for 30s, and final extension at 72°C for 1 min, followed by 72°C for 5 min.

## Data analyses

Data were entered and statistical analysis was performed using Microsoft Excel 2016 and Epi Info version 3.5. Data were cleaned and descriptive analysis was done. Bivariate analyses were done using  $\chi^2$  or Fisher's exact tests for categorical variables to find key determinants of rubella infection in Cameroon. A 95% Confidence Interval (CI) was calculated for the Odds ratio (OR), and values of  $p < 0.05$  were considered statistically significant. Logistic regression analysis was used to estimate OR of IgG and IgM seropositivity as outcome variable with age, sex, setting, pregnancy, region, presence of child who has taken RCV, number of children living in same house and tribe as explanatory variable.

## Ethical issues

The study protocol was approved by Cameroon National Ethics Committee N0 2017/11/957/CE/CNERSH/SP. It also received approval from other institutional review boards such as the Institutional Review Board of the Cameroon Baptist Convention Health Board, the Yaoundé Gyneco-Obstetric and Pediatric Hospital, the Centre Hospitalier Essos and the St Elizabeth General Catholic Hospital Shisong. Research authorizations were obtained from each hospital and health districts where participants were recruited. Consent was also obtained from parents or guardians of the minors included in the study. Informed consent was obtained from all study participants.

## Results

### Demographic characteristics of participants

Five hundred and twenty-two (522) pregnant women (Table 1) were enrolled from the Center [39.5% (206/522)] and South-West [60.5% (316/522)] regions of Cameroon. The mean ( $\pm$ SD) age of  $26.6 \pm 5.2$  years was observed. Most of the pregnant women (37.9%; 198/522) were in the 24–28 years age group. Some of the women, 16.7% (87/522) were in the first trimester of pregnancy. Among the pregnant women, 36.0% (188/522) lived in a house with no child during their pregnancy. 51.0% (266/522) of the pregnant women lived in a house in which at least one child had received a rubella containing vaccine. None of the pregnant women had received an RCV.

### Rubella clinical signs and seroprevalence of rubella virus antibodies

**Prevalence of rubella IgG and IgM antibodies.** The overall seroprevalence of rubella specific IgG antibodies at the time of data collection was 94.4% (493/522). The overall seroprevalence of rubella specific IgM was 5.0% (26/522). According to the present study, 5.5% (29/522) of the total participants had no indication of immunity to rubella virus and tested negative for both IgG and IgM antibodies (Fig 1).

**Association between rubella antibodies and characteristics of pregnant participants.** Among the pregnant participants, 94.4% (493/522) were IgG positive with the South-West region having the higher prevalence of 59.6% (294/493). 5.0% (26/522) of the pregnant participants were IgM positive within the Center region having the higher prevalence of 65.4% (17/26) and the South-west the lower with 34.6% (9/26). 5.6% (29/522) of the pregnant participants were IgG and IgM negative. Pregnant participants from the Center region were two times more likely to have a positive IgG (COR: 2.12, 95% CI: 0.89–5.07,  $p = 0.015$ ). The relationship between rubella IgG and the other sociodemographic characteristics (age group, age of pregnancy, number of children living in the same house, any child with RCV and tribe) did not show any statistically significant association. However, rubella IgG was statistically associated

**Table 1. Association between rubella antibodies and characteristics of pregnant participants.**

| Characteristics                                    | No. tested (N = 522)<br>n(%) | IgG positive (N = 493) |                 |                   | p-value |
|----------------------------------------------------|------------------------------|------------------------|-----------------|-------------------|---------|
|                                                    |                              | n(%)                   | COR             | AOR               |         |
| <b>Regions</b>                                     |                              |                        |                 |                   |         |
| Center                                             | 206(39.5)                    | 199(40.4)              | 2,12(0,89–5,07) | 0.21(0.062–0.736) | 0.015   |
| South-West                                         | 316(60.5)                    | 294(59.6)              | 1               |                   |         |
| <b>Age group (years)</b>                           |                              |                        |                 |                   |         |
| 14–18                                              | 22(4.2)                      | 22(4.5)                | -               |                   | 0.18    |
| 19–23                                              | 136(26.1)                    | 126(25.6)              | 1               |                   |         |
| 24–28                                              | 198(37.9)                    | 188(38.1)              | 1,49(0,60–3,68) |                   | 0.38    |
| 29–33                                              | 115(22.0)                    | 110(22.3)              | 1,74(0,57–5,26) |                   | 0.31    |
| ≥ 34                                               | 51(9.8)                      | 47(9.5)                | 0,93(0,27–3,11) |                   | 0.90    |
| <b>Age of pregnancy</b>                            |                              |                        |                 |                   |         |
| First trimester                                    | 87(16.7)                     | 85(17.2)               | 1               |                   |         |
| Second trimester                                   | 311(59.6)                    | 295(59.8)              | 0,43(0,09–1,92) |                   | 0.26    |
| Third trimester                                    | 124(23.8)                    | 113(22.9)              | 0,24(0,05–1,11) |                   | 0.09    |
| <b>Number of children living in the same house</b> |                              |                        |                 |                   |         |
| 0                                                  | 188(36.0)                    | 176(35.7)              | 1               |                   |         |
| ≥1                                                 | 334(64.0)                    | 317(64.3)              | 1.27(0.59–2.72) |                   | 0.67    |
| <b>Any child in house with RCV</b>                 |                              |                        |                 |                   |         |
| Yes                                                | 266(51.0)                    | 255(51.7)              | 1,51(0,66–3,45) | 3.58(1.17–11.004) | 0.025   |
| No                                                 | 212(40.6)                    | 199(40.4)              | 1               |                   |         |
| Unknown                                            | 44(8.4)                      | 39(7.9)                | 0,5(0,17–1,51)  |                   | 0.36    |

**Key:** COR: Crude Odds Ratio; CI: Confidence Interval; AOR: Adjusted Odds Ratio; N: Number; n: subtotal; %: proportion of n/N

<https://doi.org/10.1371/journal.pone.0225594.t001>

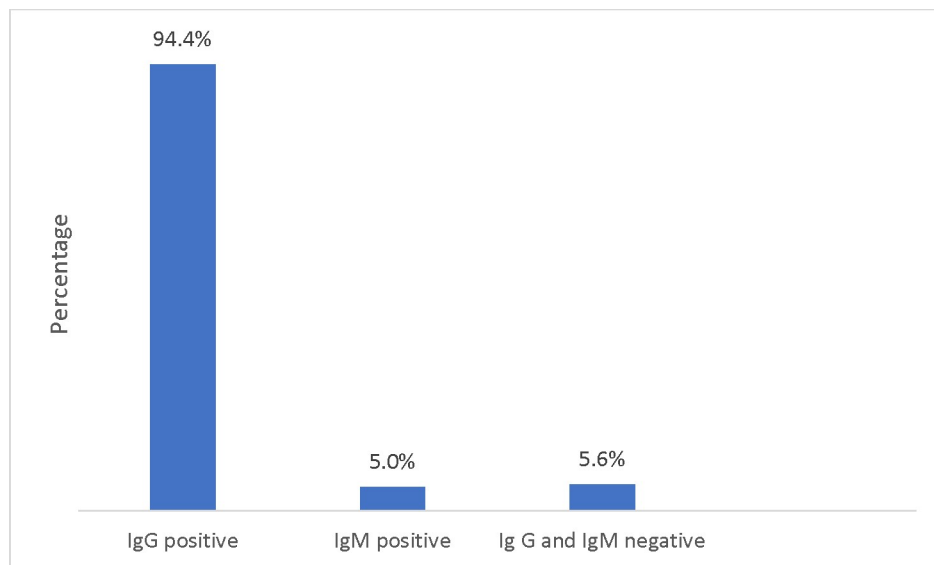

**Fig 1. Rubella immune status of pregnant women in the center and South-West regions of Cameroon.** IgG positive: indicates the proportion of participants with indication of protective immunity; IgM positive indicates possible rubella infection; IgG and IgM negative indicates no immunity to rubella.

<https://doi.org/10.1371/journal.pone.0225594.g001>

to having any child with RCV in the same house during pregnancy (COR: 3.58, 95% CI: 1.17–11.004,  $p = 0.025$ ).

**Rubella IgG avidity.** In this study, all the IgM positive cases had past rubella infection. Of 26 serum samples tested for rubella IgG avidity, all samples had high avidity rubella IgG antibodies which varied from 52.37% to 87.70% with an average of 69.87% ( $\pm 8.19\%$ ).

**Prevalence of rubella IgG and IgM antibodies among pregnant women presenting with rubella clinical signs.** In this study, 19% (99/522) of the pregnant participants presented with rubella clinical signs. 7.5% (37/493) of the IgG positive pregnant women had fever, 4.1% (20/493) had rash, 7.5% (37/493) had conjunctivitis and 0.2% (1/493) had lymphadenopathy. There was no statistically significant association between rubella IgG positivity and the presence or absence of any clinical presentation. Among the pregnant women presenting with rubella clinical signs, 7.7% (2/26) of the IgM positive participants presented with fever; 7.7% (2/26) presented with rash; 11.5% (3/26) presented with conjunctivitis and no participant positive to rubella IgM presented with lymphadenopathy. However, the number of IgM positive cases was too few for any significant statistical analyses between IgM positivity and rubella clinical signs.

### Detection of rubella virus by real time PCR

RNA was extracted from a total of 14 urine samples from the pregnant participants with positive IgM results. No rubella virus was detected from any of these samples using real time PCR.

### Discussion

This study investigated the seroprevalence of rubella among Cameroonian pregnant women attending ANC in the Center and South-West regions. Rubella antibodies (IgG and IgM) were detected using ELISA and rubella IgG avidity testing was done to determine the status of rubella infection. The findings showed that 94.4% of the pregnant women were positive to rubella IgG. This confirms previous exposure to wild type rubella virus [1, 16] since, none of the participants in this study had ever received any rubella containing vaccine. The seroprevalence of rubella IgG among pregnant women in this study (94.4%) is higher than that of previous studies in Cameroon where rubella seroprevalence varied from 83.9% to 93.4% among pregnant women attending ANC in hospitals [7, 9]. Other studies in Cameroon show recent rubella virus transmission and reported that persons aged  $\geq 15$  years were also more likely to have rubella infection than children under one [11]. Since none of the participants had received any rubella containing vaccine, our results suggest that most of the participants were probably exposed to the virus through natural rubella infection. This high level of rubella seroprevalence in Cameroon likely reflects significant transmission of rubella virus in the country. This is similar to the situation reported in other African countries such as Burkina Faso [17], where a prevalence of 95% was found; Sudan [18] with a prevalence of 95.1%; Nigeria [19] where a prevalence of 91.54% was found and in Tanzania [20], where a prevalence of 90.4% was reported.

Furthermore, as observed in other studies, all the other socio-demographic characteristics were not associated to rubella seroprevalence [16, 17, 21], except for living in the same house with a child with RCV during pregnancy. Even though there is lack of evidence of contact spread from vaccinated individuals [22], living in the same house with a vaccinated infant was protective against rubella infection during pregnancy [16]. However, more information on the timing of rubella vaccination of the children would be needed as the vaccine virus would only be shed for a short time (such as 1 month) after the vaccination was received.

This study shows a lack of immunity against rubella among a small proportion of pregnant women in Cameroon as the proportion of susceptible individuals was 5.6%. Despite the high prevalence of rubella IgG in Cameroon, some pregnant women are still at risk of rubella infection during pregnancy which might lead to the birth of infants with CRS. Presently, some young women of child bearing age are still unprotected from rubella which is consistent with some observations of CRS in Cameroon in the past few years [13]. The main aim of rubella vaccination is to prevent CRS. A measles and rubella containing vaccine was administered for the first time in Cameroon in 2015 to children between 9 months and 14 years during a mass vaccination campaign [6]. We recommend that this strategy employed by the EPI should be re-enforced by also vaccinating young women of child bearing age.

Clinical diagnosis of rubella is unreliable [23], making laboratory diagnosis an important component in the diagnosis of primary rubella infection during pregnancy. In this study, there was no significant association between the presence or absence of clinical signs and rubella IgG positivity. In Ethiopia, pregnant women without maculopapular rash had 2.5 times protective IgG antibody than those who had maculopapular rash [16].

It is recommended to test pregnant women for IgM only if symptoms are evident, if contact with a known case occurred, or if an outbreak is occurring in the region but no pregnant woman should have rubella diagnosed on the basis of a single positive rubella specific IgM test result [24]. Occasionally, rubella IgM may persist for months or years after infection [25]. Additionally, a small percentage of false positive IgM results are seen with all ELISA IgM kits and cross reactivity has been seen with rheumatoid factor and other diseases such as parvovirus B19 [25]. The positive predictive value of IgM tests declines as rubella incidence declines [25] so the need for supplementary assays to accurately diagnose rubella will become more common as Cameroon progresses toward rubella control. This study is the first study to document seroprevalence of rubella IgM in pregnant women in Cameroon. The prevalence of rubella IgM was 5.0% among the pregnant women. This falls within the range of acute rubella infection in Africa observed to vary from 0.3% in pregnant women in Mwanza, Tanzania; to 45.1% in children (1–10 years) in Jos, Nigeria [20].

In cases where a possible false positive rubella IgM result is suspected, one supplemental assay that can be used to distinguish primary infection from remote infection is the measurement of IgG avidity [14]. We recommend that the management of pregnant women presenting with a positive rubella specific IgM result should be followed up. The timing of serum collection is important for pregnant women. If the serum is collected in the first trimester and the avidity is high, rubella infection likely occurred prior to the start of the pregnancy so danger to the fetus is very low. However, if the serum was collected in the second or third trimester, the avidity could already be high if a rubella infection occurred in the first trimester so danger to the fetus cannot be ruled out by high avidity. The interpretation of the results in this study is that past rubella infection had occurred in all IgM positive individuals, as the avidity results were above 50%. Even though all the avidity results were high, it does not completely exclude the possibility of a recent secondary infection. Secondary infections cannot be confirmed without two serum samples with one collected close to onset and a second sample collected one to two weeks later, which was not done in this study. The risk of defects in the fetus due to secondary infection is substantially less than the risk from primary rubella [26]. For IgM positive women presenting with symptoms consistent with rubella, another option for laboratory confirmation of disease is to use ribonucleic acid (RNA) detection by reverse-transcription polymerase chain reaction (PCR) assays on samples such as throat swabs or urine. In this study, 14 urine samples from the IgM positive women were tested with negative results. Real time PCR is most likely to be positive for samples collected within 4 days of disease onset [27]. From this study, no participant presented with an acute rubella infection.

The findings from our study further support the fact that rubella infection represents a public health burden. However, this study was subject to limitations including the small number of IgG negative and IgM positive cases, and no positive result after PCR. Due to limited resources, this cross-sectional survey was done only in two out of ten regions in Cameroon. Despite these limitations, our results highlight the need to investigate rubella during pregnancy, encourage the vaccination of young women of reproductive age presenting with no rubella immunity, and interpret IgM positive results carefully.

## Conclusion

The seroprevalence of rubella IgM antibodies was 5.0% in the pregnant participants. No participant presented with an acute/recent rubella infection, as confirmed with high avidity. Before taking any decision to interrupt any pregnancy because of a positive rubella IgM result, IgG avidity testing should be done. Our study reveals that susceptible pregnant women without immunity to rubella are present in the population and they are at risk of bearing children with CRS. Hence, rubella screening of women of child bearing age should be encouraged, those who lack immunity should be vaccinated, and rubella-based surveillance should be strengthened to reduce the burden of rubella and CRS in Cameroon.

## Supporting information

**S1 Table. Rubella seroprevalence Cameroon.**  
(XLSX)

## Acknowledgments

The authors are grateful to the Viral Vaccine Preventable Diseases Branch (VVPDB) of the Centers for Disease Control and Prevention, CDC Atlanta, USA for providing technical support, reagent and supplies for this study. We wish to thank all physicians and technicians at the participating hospitals especially the laboratory staff of the Mother and Child Center of the Chantal Biya Foundation where samples were stored before shipment to CDC Atlanta. We are also grateful to all the pregnant women who participated in this study.

**Disclaimer:** The findings and conclusions in this report are those of the author(s) and do not necessarily represent the official position of the Centers for Disease Control and Prevention. Names of specific vendors, manufacturers, or products are included for public health and informational purposes; inclusion does not imply endorsement of the vendors, manufacturers, or products by the Centers for Disease Control and Prevention or the US Department of Health and Human Services.

## Author Contributions

**Conceptualization:** Nadesh Ashukem Taku, Valantine Ngum Ndze, Diane Waku-Kouomou, Jane-Francis K. T. Akoachere.

**Data curation:** Nadesh Ashukem Taku, Valantine Ngum Ndze.

**Formal analysis:** Nadesh Ashukem Taku.

**Funding acquisition:** Emily Abernathy, LiJuan Hao, Diane Waku-Kouomou, Joseph P. Icenogle.

**Investigation:** Nadesh Ashukem Taku, Emily Abernathy, Samuel Wanji, Jane-Francis K. T. Akoachere.



**Methodology:** Nadesh Ashukem Taku, Valantine Ngum Ndze, Emily Abernathy, LiJuan Hao, Diane Waku-Kouomou, Joseph P. Icenogle, Samuel Wanji, Jane-Francis K. T. Akoachere.

**Project administration:** Nadesh Ashukem Taku.

**Supervision:** Valantine Ngum Ndze, Diane Waku-Kouomou, Samuel Wanji, Jane-Francis K. T. Akoachere.

**Validation:** Valantine Ngum Ndze, Diane Waku-Kouomou, Joseph P. Icenogle, Samuel Wanji, Jane-Francis K. T. Akoachere.

**Visualization:** Nadesh Ashukem Taku.

**Writing – original draft:** Nadesh Ashukem Taku, Valantine Ngum Ndze.

**Writing – review & editing:** Nadesh Ashukem Taku, Valantine Ngum Ndze, Emily Abernathy, Diane Waku-Kouomou, Joseph P. Icenogle, Samuel Wanji, Jane-Francis K. T. Akoachere.

## References

1. WHO. Rubella vaccines. *Weekly Epidemiological Record*. 2000; 75(21):161–72.
2. WHO. Status Report on Progress Towards Measles and Rubella Elimination SAGE Working Group on Measles and Rubella (22 October 2012) 2012 [Available from: [https://www.who.int/immunization/sage/meetings/2012/november/1\\_Status\\_Report\\_Measles\\_Rubella\\_22\\_Oct.pdf](https://www.who.int/immunization/sage/meetings/2012/november/1_Status_Report_Measles_Rubella_22_Oct.pdf)].
3. Miller E, Craddock-Watson JE, Pollock TM. Consequences of confirmed maternal rubella at successive stages of pregnancy. *Lancet*. 1982; 2(8302):781–4. [https://doi.org/10.1016/s0140-6736\(82\)92677-0](https://doi.org/10.1016/s0140-6736(82)92677-0) PMID: 6126663
4. Fenner F. Candidate viral diseases for elimination or eradication. *Bull World Health Organ*. 1998; 76 Suppl 2:68–70.
5. Reef SE, Redd SB, Abernathy E, Zimmerman L, Icenogle JP. The epidemiological profile of rubella and congenital rubella syndrome in the United States, 1998–2004: the evidence for absence of endemic transmission. *Clin Infect Dis*. 2006; 43 Suppl 3:S126–32.
6. Munteh YN. Cameroon: Measles/Rubella—Littoral: 1.2 Million Children for Vaccination. *Cameroon Tribune*. 2015.
7. Ndumbe PM, Andela A, Nkemnkeng-Asong J, Watonsi E, Nyambi P. Prevalence of infections affecting the child among pregnant women in Yaounde, Cameroon. *Med Microbiol Immunol*. 1992; 181(3):127–30. <https://doi.org/10.1007/bf00202052> PMID: 1522822
8. Fokunang CN, Chia J, Mbu P, Atashili J. Clinical studies on seroprevalence of rubella virus in pregnant women of Cameroon regions. *African Journal of Clinical and Experimental Microbiology*. 2010; 11(2):79–94.
9. Noubom M, Kombou T, DG., Sama L, Wam E, Sadjeu S, Kenfack B, et al. Seroprevalence of Rubella IgM and IgG Antibodies and Associated Risk Factors among Pregnant Women Attending Antenatal Clinic at Bafoussam Regional Hospital, West Region of Cameroon. *Journal of Tropical Diseases*. 2018; 6(4).
10. Achonduh-Atijegbe OA, Mfuh KO, Mbange AH, Chedjou JP, Taylor DW, Nerurkar VR, et al. Prevalence of malaria, typhoid, toxoplasmosis and rubella among febrile children in Cameroon. *BMC Infect Dis*. 2016; 16(1):658. <https://doi.org/10.1186/s12879-016-1996-y> PMID: 27825318
11. Nimpa Mengouo M, Ndze VN, Baonga F, Kobela M, Wiysonge CS. Epidemiology of rubella infection in Cameroon: a 7-year experience of measles and rubella case-based surveillance, 2008–2014. *BMJ Open*. 2017; 7(4):e012959. <https://doi.org/10.1136/bmjopen-2016-012959> PMID: 28389483
12. Njoh AA, Njoh SN, Abizou MB. Fetal malformation in maternal toxoplasma and rubella co-infection in Cameroon: a case report. *J Med Case Rep*. 2016; 10(1):345. <https://doi.org/10.1186/s13256-016-1133-y> PMID: 27912790
13. Jivraj I, Rudnisky CJ, Tambe E, Tipple G, Tennant MT. Identification of ocular and auditory manifestations of congenital rubella syndrome in mbingo. *Int J Telemed Appl*. 2014; 2014:981312. <https://doi.org/10.1155/2014/981312> PMID: 25525427
14. Thomas HI, Morgan-Capner P, Enders G, O'Shea S, Caldicott D, Best JM. Persistence of specific IgM and low avidity specific IgG1 following primary rubella. *Journal of virological methods*. 1992; 39(1–2):149–55. [https://doi.org/10.1016/0166-0934\(92\)90133-x](https://doi.org/10.1016/0166-0934(92)90133-x) PMID: 1430059

15. Zhu Z, Xu W, Abernathy ES, Chen M, Zheng Q, Wang T, et al. Comparison of four methods using throat swabs to confirm rubella virus infection. *J Clin Microbiol*. 2007; 45(9):2847–2852. <https://doi.org/10.1128/JCM.00289-07> PMID: 17596370
16. Wondimeneh Y, Tiruneh M, Ferede G, Abera B, Workineh M, Birhanie M, et al. Rubella virus infections and immune status among pregnant women before the introduction of rubella vaccine in Amhara Regional State, Ethiopia. *Int J Infect Dis*. 2018; 76:14–22. <https://doi.org/10.1016/j.ijid.2018.07.024> PMID: 30165188
17. Tahita MC, Hubschen JM, Tarnagda Z, Ernest D, Charpentier E, Kremer JR, et al. Rubella seroprevalence among pregnant women in Burkina Faso. *BMC Infect Dis*. 2013; 13:164. <https://doi.org/10.1186/1471-2334-13-164> PMID: 23556510
18. Adam O, Makkawi T, Kannan A, Osman ME. Seroprevalence of rubella among pregnant women in Khartoum state, Sudan. *East Mediterr Health J*. 2013; 19(9):812–5. PMID: 24313044
19. Adewumi OM, Olayinka OA, Olusola BA, Faleye TO, Sule WF, Adesina O. Epidemiological Evaluation of Rubella Virus Infection among Pregnant Women in Ibadan, Nigeria. *J Immunoassay Immunochem*. 2015; 36(6):613–21. <https://doi.org/10.1080/15321819.2015.1027404> PMID: 25774539
20. Mirambo MM, Majigo M, Scana SD, Mushi MF, Aboud S, Gross U, et al. Rubella natural immunity among adolescent girls in Tanzania: the need to vaccinate child bearing aged women. *BMC Womens Health*. 2018; 18(1):3. <https://doi.org/10.1186/s12905-017-0505-9> PMID: 29298693
21. Alleman MM, Wannemuehler KA, Hao L, Perelygina L, Icenogle JP, Vynnycky E, et al. Estimating the burden of rubella virus infection and congenital rubella syndrome through a rubella immunity assessment among pregnant women in the Democratic Republic of the Congo: Potential impact on vaccination policy. *Vaccine*. 2016; 34(51):6502–11. <https://doi.org/10.1016/j.vaccine.2016.10.059> PMID: 27866768
22. Reef SE, Plotkin SA. Rubella vaccine. In: Plotkin S, Orenstein W, Offit P, editors. *vaccines*. 6th: Elsevier; 2012. p. 688–717.
23. Anderson MJ, Kidd IM, Morgan-Capner P. Human parvovirus and rubella-like illness. *Lancet*. 1985; 2(8456):663.
24. Public-Health-England. Guidance on viral rash in pregnancy 2011 [Available from: <https://www.gov.uk/government/publications/viral-rash-in-pregnancy>].
25. Best JM, Enders G. *Laboratory Diagnosis of Rubella and Congenital Rubella*. Banatvala J, Peckham C, editors: Elsevier; 2006.
26. Best JM. Rubella. *Semin Fetal Neonatal Med*. 2007; 12(3):182–92. <https://doi.org/10.1016/j.siny.2007.01.017> PMID: 17337363
27. Abernathy E, Cabezas C, Sun H, Zheng Q, Chen MH, Castillo-Solorzano C, et al. Confirmation of rubella within 4 days of rash onset: comparison of rubella virus RNA detection in oral fluid with immunoglobulin M detection in serum or oral fluid. *Journal of clinical microbiology*. 2009; 47(1):182–8. <https://doi.org/10.1128/JCM.01231-08> PMID: 19005151
